# Supplementary material for: Association of Self-reported Presenting Symptoms With Timeliness of Help-Seeking Among Adolescents and Young Adults With Cancer in the BRIGHTLIGHT Study
Source: PubMed Central journal article supplement (PMC7489839; doi:10.1001/jamanetworkopen.2020.15437), 2020-09-03
Supplement: jamanetwopen-e2015437-s001.pdf [file jamanetwopen-e2015437-s001.pdf]

## Supplementary Online Content

Koo MM, Lyrtzopoulos G, Herbert A, et al. Association of self-reported presenting symptoms with timeliness of help-seeking among adolescents and young adults with cancer in the BRIGHTLIGHT study. *JAMA Netw Open*. 2020;3(9):e2015437. doi:10.1001/jamanetworkopen.2020.15437

**eTable 1.** Presenting Symptoms Among the BRIGHTLIGHT Cohort

**eFigure.** Flow Diagram Indicating Derivation of the Study Population

**eTable 2.** Cancer-Specific Symptom Signatures (Frequency of Symptoms by Cancer Site)

**eTable 3.** Percentages of a Patient Interval >1 Month Associated With Each Symptom, Stratified by Cancer Site

This supplementary material has been provided by the authors to give readers additional information about their work.

**eTable 1: Presenting symptoms among the BRIGHTLIGHT cohort**

Elicited as part of the BRIGHTLIGHT survey on pre-diagnostic events with the following question: “Did you have any of the symptoms listed on this card? Please just read out the letter or letters that apply.”

| Symptom included in the current analysis | Details of provenance                                                                                                                                                                                                                                                              |
|------------------------------------------|------------------------------------------------------------------------------------------------------------------------------------------------------------------------------------------------------------------------------------------------------------------------------------|
| Unexplained pain                         | Originally described as “Pain for no apparent reason”                                                                                                                                                                                                                              |
| Lump/swelling                            | Originally described as “Lump or swelling”                                                                                                                                                                                                                                         |
| Lymphadenopathy                          | Originally described as “Swollen/enlarged lymph nodes (Your doctor may have called this lymphadenopathy)”                                                                                                                                                                          |
| Headaches                                | Originally described as “Headaches for no apparent reason”                                                                                                                                                                                                                         |
| Extreme tiredness                        | Originally described as “Extreme tiredness (your doctor may have called this fatigue)”                                                                                                                                                                                             |
| Weight loss                              | Originally described as “Losing weight/loss of weight without dieting”                                                                                                                                                                                                             |
| Bruising/bleeding                        | Originally described as “Bruising or bleeding for no apparent reason”                                                                                                                                                                                                              |
| Loss of vision                           | Originally described as “Loss of vision”                                                                                                                                                                                                                                           |
| Mole changes                             | Originally described as “Change in the size, colour or appearance of a mole”                                                                                                                                                                                                       |
| Menstrual changes                        | Originally described as “Changes in your periods” [only asked to participants coded as female]                                                                                                                                                                                     |
| Dizziness                                | Originally described as “Feeling dizzy”                                                                                                                                                                                                                                            |
| Fits/seizures                            | Originally described as “Having fits/seizures”                                                                                                                                                                                                                                     |
| Limping/mobility                         | Originally described as “Limping/mobility problems”                                                                                                                                                                                                                                |
| Rash/itching                             | Originally described as “Rash/itching”                                                                                                                                                                                                                                             |
| Recurrent infections                     | Originally described as “Recurrent infections”                                                                                                                                                                                                                                     |
| Night sweats                             | Originally described as “Sweating at night”                                                                                                                                                                                                                                        |
| Other symptoms                           | Originally described as “Other symptoms (please state)”, encompassing a range of free-text responses including the following:<br>CNS/PNS symptoms<br>Breathlessness<br>Nausea/vomiting<br>Cough<br>Fever<br>Fainting/pallor<br>Oedema<br>ENT symptoms<br>Haematuria<br>Haemoptysis |

CNS=central nervous system; ENT=ear, nose, throat related; PNS=peripheral nervous system.

**eFigure. Flow Diagram Indicating Derivation of the Study Population**

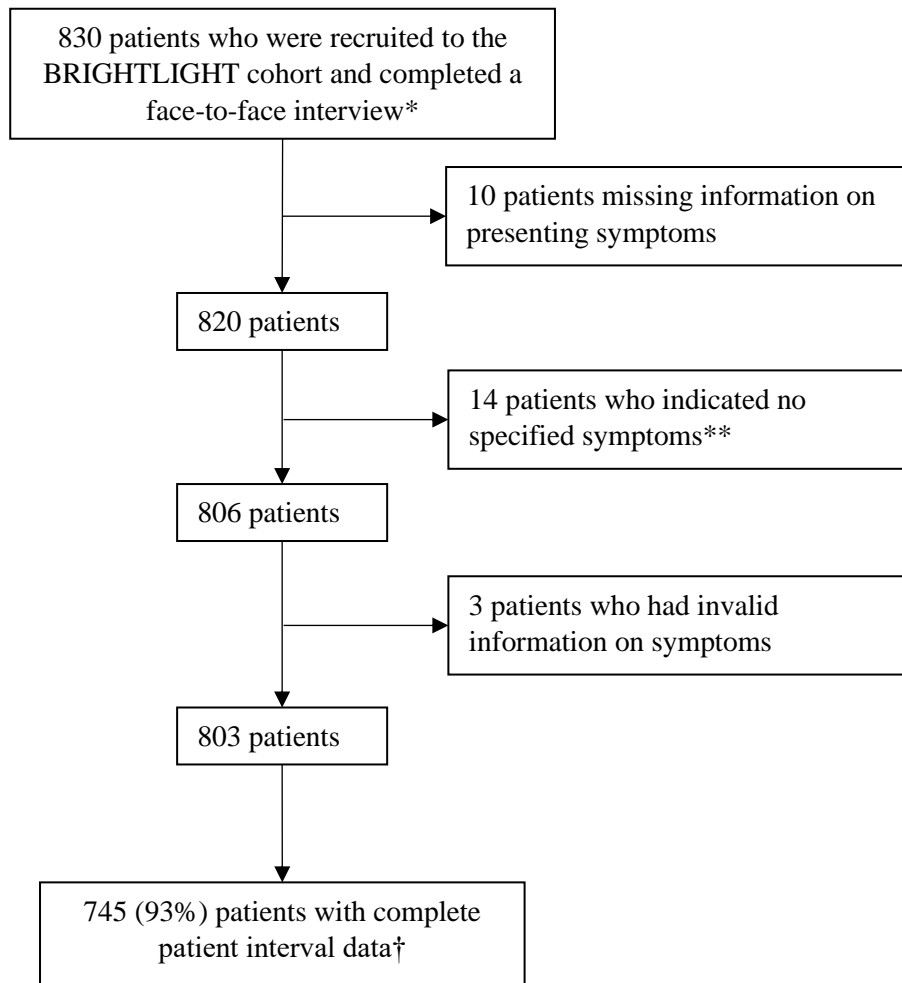

\* BRIGHTLIGHT aimed to recruit 13–24 year olds, however five patients aged 12 years were included in the study due to mismatched dates of diagnosis between the recruiting centre and cancer registration (these patients were included as they were close to their 13<sup>th</sup> birthday at recruitment).

\*\*The 14 patients who had not specified symptoms were more likely to be female, married/in a civil partnership, and subsequently diagnosed with melanomas or soft-tissue sarcomas.

† For patients who had missing date of symptom onset or date of help-seeking, the patient interval (time from symptom onset to first clinical presentation) could not be estimated (Herbert et al., 2018 [http://dx.doi.org/10.1016/S2352-4642\(18\)30004-X](http://dx.doi.org/10.1016/S2352-4642(18)30004-X)).

**eTable 2: Cancer-Specific Symptom Signatures (Frequency of Symptoms by Cancer Site)**

The frequency of symptoms by cancer site (calculated by column). As the majority of patients had multiple symptoms, the proportions do not sum to 100%.

| Symptom                   | Lymphoma (n=260) | Germ cell <sup>1</sup> (n=155) | Leukaemia (n=102) | Carcinomas (n=94) | Bone (n=78) | STS (n=44) | CNS (n=31) | Melanoma (n=29) | Unclass. or Unspec. (n=10) |
|---------------------------|------------------|--------------------------------|-------------------|-------------------|-------------|------------|------------|-----------------|----------------------------|
| Lump/swelling             | 60%              | 74%                            | 13%               | 54%               | 64%         | 66%        | 3%         | 10%             | 10%                        |
| Extreme tiredness         | 48%              | 21%                            | 73%               | 38%               | 13%         | 23%        | 42%        | 3%              | 60%                        |
| Unexplained pain          | 26%              | 42%                            | 32%               | 40%               | 60%         | 34%        | 23%        | 3%              | 70%                        |
| Night sweats              | 43%              | 9%                             | 30%               | 14%               | 10%         | 11%        | 13%        | 7%              | 20%                        |
| Lymphadenopathy           | 55%              | 7%                             | 15%               | 13%               | 4%          | 7%         | .          | 7%              | 10%                        |
| Weight loss               | 36%              | 10%                            | 35%               | 14%               | 18%         | 16%        | 23%        | 3%              | 20%                        |
| Headaches                 | 13%              | 9%                             | 40%               | 7%                | 4%          | 9%         | 71%        | .               | 20%                        |
| Dizziness                 | 16%              | 9%                             | 34%               | 15%               | 4%          | 9%         | 35%        | .               | 40%                        |
| Rash/itching              | 23%              | 2%                             | 12%               | 5%                | 4%          | 2%         | 3%         | 24%             | 10%                        |
| Limping/mobility problems | 8%               | 1%                             | 10%               | 3%                | 42%         | 7%         | 6%         | 3%              | 20%                        |
| Recurrent infections      | 7%               | 3%                             | 12%               | 10%               | 3%          | .          | .          | 3%              | .                          |
| Other symptoms            | 6%               | 6%                             | 16%               | 12%               | 8%          | 16%        | 13%        | .               | 10%                        |
| Bruising/bleeding         | 4%               | 3%                             | 39%               | 14%               | 1%          | 2%         | 3%         | .               | 10%                        |
| Menstrual changes         | 5%               | 6%                             | 10%               | 15%               | 5%          | 2%         | 3%         | .               | 20%                        |
| Mole changes              | 2%               | .                              | 5%                | 2%                | 3%          | 2%         | .          | 83%             | .                          |
| Fits/seizures             | 2%               | .                              | .                 | 2%                | 1%          | .          | 32%        | .               | .                          |
| Loss of vision            | 1%               | 1%                             | 9%                | 2%                | 1%          | 5%         | 29%        | .               | .                          |

CNS=CNS and other intracranial and intra-spinal neoplasms; STS=soft tissue sarcomas; Unclass. / unspec. = unclassified/ unspecified

<sup>1</sup> Comprising patients with testicular germ cell cancer (n=119, 77%), ovarian germ cell cancer (n=11, 7%), and other germ cell tumours (n=25, 16%)

**eTable 3: Percentages of a Patient Interval >1 Month Associated With Each Symptom, Stratified by Cancer Site**

The percentages in the table below indicate the proportion of patients with a patient interval >1 month among all patients with a particular presenting symptom. For example, of the 149 lymphoma patients who presented with lump/swelling, 40 (27%) had a patient interval >1 month; while of the 117 lymphoma patients who presented with extreme tiredness, 35 (30%) of patients had a patient interval >1 month.

| Presenting symptom        | Proportion of cancer patients who had a patient interval >1 month<br><i>Based on 745 patients with complete patient interval information<sup>1</sup></i> |                        |             |             |             |             |            |             |                     |
|---------------------------|----------------------------------------------------------------------------------------------------------------------------------------------------------|------------------------|-------------|-------------|-------------|-------------|------------|-------------|---------------------|
|                           | Lymphoma                                                                                                                                                 | Germ cell <sup>2</sup> | Leukaemia   | Carcinomas  | Bone        | STS         | CNS        | Melanoma    | Unclass. or Unspec. |
| Total (any symptom)       | 66/248 (27%)                                                                                                                                             | 36/146 (25%)           | 22/88 (25%) | 28/87 (32%) | 17/68 (25%) | 13/41 (32%) | 5/29 (17%) | 14/28 (50%) | 3/10 (30%)          |
| Lump/swelling             | 40/149 (27%)                                                                                                                                             | 25/108 (23%)           | 4/11 (36%)  | 13/47 (28%) | 9/44 (20%)  | 9/27 (33%)  | 1/1 (100%) | 2/3 (67%)   | 0/1 (0%)            |
| Extreme tiredness         | 35/117 (30%)                                                                                                                                             | 9/30 (30%)             | 15/62 (24%) | 10/33 (30%) | 4/10 (40%)  | 4/10 (40%)  | 3/13 (23%) | 1/1 (100%)  | 2/6 (33%)           |
| Unexplained pain          | 17/66 (26%)                                                                                                                                              | 17/61 (28%)            | 10/29 (34%) | 10/34 (29%) | 13/40 (33%) | 5/15 (33%)  | 1/7 (14%)  | 1/1 (100%)  | 3/7 (43%)           |
| Night sweats              | 37/108 (34%)                                                                                                                                             | 7/13 (54%)             | 9/26 (35%)  | 4/13 (31%)  | 4/8 (50%)   | 2/4 (50%)   | 0/4 (0%)   | 1/1 (100%)  | 0/2 (0%)            |
| Lymphadenopathy           | 40/136 (29%)                                                                                                                                             | 1/11 (9%)              | 3/13 (23%)  | 4/12 (33%)  | 1/3 (33%)   | 0/3 (0%)    |            | 1/2 (50%)   | 0/1 (0%)            |
| Weight loss               | 30/89 (34%)                                                                                                                                              | 5/15 (33%)             | 11/33 (33%) | 4/11 (36%)  | 3/13 (23%)  | 3/7 (43%)   | 1/6 (17%)  | 0/1 (0%)    | 0/2 (0%)            |
| Headaches                 | 12/31 (39%)                                                                                                                                              | 6/12 (50%)             | 9/36 (25%)  | 1/5 (20%)   | 3/3 (100%)  | 1/4 (25%)   | 4/21 (19%) |             | 0/2 (0%)            |
| Dizziness                 | 11/39 (28%)                                                                                                                                              | 5/12 (42%)             | 7/31 (23%)  | 3/13 (23%)  | 2/3 (67%)   | 2/4 (50%)   | 2/11 (18%) |             | 0/4 (0%)            |
| Rash/itching              | 14/59 (24%)                                                                                                                                              | 1/2 (50%)              | 1/9 (11%)   | 1/4 (25%)   | 1/3 (33%)   | 1/1 (100%)  | 0/1 (0%)   | 5/7 (71%)   | 0/1 (0%)            |
| Limping/mobility problems | 4/17 (24%)                                                                                                                                               | 0/2 (0%)               | 2/10 (20%)  | 0/3 (0%)    | 9/29 (31%)  | 2/3 (67%)   | 1/2 (50%)  | 0/1 (0%)    | 0/2 (0%)            |
| Recurrent infections      | 8/18 (44%)                                                                                                                                               | 1/3 (33%)              | 1/9 (11%)   | 6/9 (67%)   | 1/2 (50%)   |             |            | 1/1 (100%)  |                     |
| Other symptoms            | 4/15 (27%)                                                                                                                                               | 5/9 (56%)              | 3/16 (19%)  | 3/11 (27%)  | 1/3 (33%)   | 1/7 (14%)   | 0/4 (0%)   |             | 0/1 (0%)            |
| Bruising/bleeding         | 1/10 (10%)                                                                                                                                               | 2/4 (50%)              | 8/33 (24%)  | 5/12 (42%)  | 1/1 (100%)  |             | 0/1 (0%)   |             | 0/1 (0%)            |
| Menstrual changes         | 1/12 (8%)                                                                                                                                                | 2/8 (25%)              | 1/8 (13%)   | 6/12 (50%)  | 2/3 (67%)   | 1/1 (100%)  | 0/1 (0%)   |             | 1/2 (50%)           |
| Mole changes              | 0/6 (0%)                                                                                                                                                 |                        | 1/5 (20%)   | 1/2 (50%)   | 0/2 (0%)    | 1/1 (100%)  |            | 12/24 (50%) |                     |
| Fits/seizures             | 0/4 (0%)                                                                                                                                                 |                        |             | 0/2 (0%)    | 0/1 (0%)    |             | 1/10 (10%) |             |                     |
| Loss of vision            | 1/3 (33%)                                                                                                                                                |                        | 2/6 (33%)   | 0/1 (0%)    | 0/1 (0%)    | 1/2 (50%)   | 4/8 (50%)  |             |                     |

CNS=CNS and other intracranial and intra-spinal neoplasms; STS=soft tissue sarcomas; Unclass. / unspec. = unclassified/ unspecified

<sup>1</sup> Numerators of the presented proportions in each column do not sum to the total number of patients with a patient interval >1 month as indicated in the first row, as some patients had multiple presenting symptoms.

<sup>2</sup> Comprising patients with testicular germ cell cancer (n=119, 77%), ovarian germ cell cancer (n=11, 7%), and other germ cell tumours (n=25, 16%)

Blank cells indicate that there were no patients that presented with a specific symptom (row) and were diagnosed with a specific cancer (column), while zero percentages indicate that all patients with that particular symptom/cancer pair had a patient interval ≤1 month.
